# Supplementary material for: Homochiral column structure of rac- and Λ-[MIII(tn)3]P3O9 (M = Co, Cr; tn = 1,3-diaminopropane; P3O9 = cyclotriphosphate(3−)) produced by multiple hydrogen bonds
Source: Royal Society of Chemistry journal article supplement (doi:10.1039/c0nj00270d), 2010-01-01
Supplement: c0nj00270d.pdf [file c0nj00270d.pdf]

*Electronic Supplementary Information*

## **Homochiral column structure of *rac*- and $\Lambda$ -[M<sup>III</sup>(tn)<sub>3</sub>]P<sub>3</sub>O<sub>9</sub> (M = Co, Cr; tn = 1,3-diaminopropane; P<sub>3</sub>O<sub>9</sub> = cyclotriphosphate(3-)) produced by multiple hydrogen bonds<sup>†</sup>**

Yukinari Sunatsuki,<sup>\*a</sup> Sho Miyahara,<sup>a</sup> Takayoshi Suzuki,<sup>a</sup> Masaaki Kojima,<sup>\*a</sup> Toshio Nakashima,<sup>b</sup> Naohide Matsumoto,<sup>c</sup> and Frode Galsbøl<sup>d</sup>

<sup>a</sup> *Department of Chemistry, Faculty of Science, Okayama University, Tsushima-naka 3-1-1, Okayama 700-8530, Japan.*

*E-mail: sunatuki@cc.okayama-u.ac.jp (Y.S.), kojima@cc.okayama-u.ac.jp (M.K.).*

<sup>b</sup> *Department of Chemistry, Faculty of Education and Welfare Science, Oita University, Dan-noura, Oita 870-1192, Japan.*

<sup>c</sup> *Department of Chemistry, Faculty of Science, Kumamoto University, Kurokami 2-39-1, Kumamoto 860-8555, Japan.*

<sup>d</sup> *Department of Chemistry, University of Copenhagen, Universitetsparken 5, DK-2100 Copenhagen, Denmark.*

**Table S1** Hydrogen bond distances and angles for *rac*-[Co(tn)<sub>3</sub>]P<sub>3</sub>O<sub>9</sub>·7.3H<sub>2</sub>O

| <b>Co1 (N1–N6)</b>               |          |       |         |            |
|----------------------------------|----------|-------|---------|------------|
| D–H···A                          | D···A/Å  | D–H/Å | H···A/Å | ∠D–H···A/° |
| N(1)–H(1)···O(5)                 | 2.866(5) | 0.920 | 2.029   | 151        |
| N(1)–H(2)···O(4)*                | 2.874(4) | 0.920 | 1.955   | 178        |
| N(2)–H(9)···O(38)                | 2.855(4) | 0.920 | 1.942   | 172        |
| N(2)–H(10)···O(41) <sup>†</sup>  | 3.251(5) | 0.920 | 2.524   | 136        |
| N(3)–H(11)···O(5)                | 3.023(5) | 0.920 | 2.268   | 139        |
| N(3)–H(12)···O(50) <sup>†</sup>  | 3.102(5) | 0.920 | 2.290   | 147        |
| N(4)–H(19)···O(15)               | 2.904(4) | 0.920 | 2.025   | 160        |
| N(4)–H(20)···O(36) <sup>‡</sup>  | 2.950(5) | 0.920 | 2.038   | 171        |
| N(5)–H(21)···O(5)                | 2.798(4) | 0.920 | 2.014   | 142        |
| N(5)–H(22)···O(36) <sup>‡</sup>  | 2.893(5) | 0.920 | 1.977   | 174        |
| N(6)–H(29)···O(15)               | 3.216(4) | 0.920 | 2.423   | 144        |
| N(6)–H(29)···O(38)               | 2.987(5) | 0.920 | 2.356   | 126        |
| N(6)–H(30)···O(4)*               | 2.959(4) | 0.920 | 2.049   | 170        |
| <b>Co2 (N7–N12)</b>              |          |       |         |            |
| D–H···A                          | D···A/Å  | D–H/Å | H···A/Å | ∠D–H···A/° |
| N(7)–H(31)···O(14)               | 2.868(4) | 0.920 | 2.022   | 152        |
| N(7)–H(32)···O(22) <sup>§</sup>  | 2.964(4) | 0.920 | 2.059   | 168        |
| N(8)–H(39)···O(48)               | 2.901(4) | 0.920 | 1.989   | 171        |
| N(8)–H(40)···O(47)               | 2.923(5) | 0.920 | 2.100   | 148        |
| N(9)–H(41)···O(14)               | 3.157(4) | 0.920 | 2.308   | 153        |
| N(9)–H(42)···O(43)               | 2.962(5) | 0.920 | 2.228   | 136        |
| N(10)–H(49)···O(24)              | 2.918(5) | 0.920 | 2.023   | 164        |
| N(10)–H(50)···O(32) <sup>□</sup> | 3.031(5) | 0.920 | 2.197   | 150        |
| N(11)–H(51)···O(14)              | 2.846(4) | 0.920 | 1.942   | 167        |
| N(11)–H(52)···O(46) <sup>¶</sup> | 2.884(5) | 0.920 | 2.012   | 158        |
| N(12)–H(59)···O(24)              | 3.049(4) | 0.920 | 2.158   | 163        |
| N(12)–H(59)···O(48)              | 3.038(5) | 0.920 | 2.574   | 112        |
| N(12)–H(60)···O(22) <sup>§</sup> | 2.994(4) | 0.920 | 2.108   | 162        |

**Table S1** (continued) Hydrogen bond distances **and angles** for *rac*-[Co(tn)<sub>3</sub>]P<sub>3</sub>O<sub>9</sub>·7.3H<sub>2</sub>O  
**Co1 (N13–N18)**

| D–H···A                          | D···A/Å  | D–H/Å | H···A/Å | ∠D–H···A/° |
|----------------------------------|----------|-------|---------|------------|
| N(13)–H(61)···O(23)              | 2.817(4) | 0.920 | 1.921   | 164        |
| N(13)–H(62)···O(13) <sup>§</sup> | 2.911(4) | 0.920 | 2.003   | 169        |
| N(14)–H(69)···O(35)              | 2.916(4) | 0.920 | 2.011   | 168        |
| N(14)–H(70)···O(34)              | 3.037(5) | 0.920 | 2.243   | 144        |
| N(15)–H(71)···O(27)              | 2.846(5) | 0.920 | 1.942   | 167        |
| N(15)–H(72)···O(25)              | 3.034(4) | 0.920 | 2.335   | 133        |
| N(16)–H(79)···O(6)**             | 2.854(4) | 0.920 | 2.036   | 147        |
| N(16)–H(80)···O(33) <sup>□</sup> | 2.964(5) | 0.920 | 2.097   | 157        |
| N(17)–H(81)···O(23)              | 2.850(4) | 0.920 | 1.944   | 168        |
| N(17)–H(82)···O(27)              | 3.039(4) | 0.920 | 2.358   | 131        |
| N(17)–H(82)···O(33) <sup>□</sup> | 3.051(5) | 0.920 | 2.261   | 144        |
| N(18)–H(89)···O(6)**             | 3.014(4) | 0.920 | 2.151   | 156        |
| N(18)–H(89)···O(35)              | 3.024(5) | 0.920 | 2.545   | 113        |
| N(18)–H(90)···O(13) <sup>§</sup> | 3.059(4) | 0.920 | 2.192   | 157        |

Symmetry operators; \*:  $-x -y -z$ ; †:  $x-1 \ 1/2-y \ -1/2+z$ ; ‡:  $x-1 \ y \ z-1$ ; §:  $2-x -y \ 1-z$ ; □:  $x+1 \ y \ z$ ; ¶:  $x \ 1/2-y \ -1/2+z$ ; \*\*:  $x+2 \ y \ z+1$ .

**Table S2** Hydrogen bond distances and angles for *rac*-[Cr(tn)<sub>3</sub>]P<sub>3</sub>O<sub>9</sub>·7.5H<sub>2</sub>O

| <b>Cr1 (N1–N6)</b>               |          |       |         |            |
|----------------------------------|----------|-------|---------|------------|
| D–H···A                          | D···A/Å  | D–H/Å | H···A/Å | ∠D–H···A/° |
| N(1)–H(1)···O(20)                | 2.896(4) | 0.920 | 2.030   | 156        |
| N(1)–H(2)···O(9)                 | 2.892(3) | 0.920 | 1.985   | 168        |
| N(2)–H(9)···O(8)*                | 2.903(3) | 0.920 | 1.995   | 169        |
| N(2)–H(10)···O(6) <sup>†</sup>   | 3.067(3) | 0.920 | 2.200   | 157        |
| N(3)–H(11)···O(8)*               | 3.093(3) | 0.920 | 2.249   | 152        |
| N(3)–H(11)···O(9)*               | 3.257(4) | 0.920 | 2.528   | 136        |
| N(3)–H(12)···O(9)                | 2.824(3) | 0.920 | 1.915   | 170        |
| N(4)–H(19)···O(26) <sup>‡</sup>  | 2.943(3) | 0.920 | 2.187   | 139        |
| N(4)–H(20)···O(29) <sup>‡</sup>  | 2.938(4) | 0.920 | 2.026   | 171        |
| N(5)–H(21)···O(7)                | 2.928(3) | 0.920 | 2.119   | 146        |
| N(5)–H(22)···O(20)               | 3.027(2) | 0.920 | 2.151   | 159        |
| N(6)–H(29)···O(19)               | 3.013(3) | 0.920 | 2.156   | 155        |
| N(6)–H(30)···O(6) <sup>†</sup>   | 2.899(3) | 0.920 | 2.062   | 151        |
| <b>Cr2 (N7–N12)</b>              |          |       |         |            |
| D–H···A                          | D···A/Å  | D–H/Å | H···A/Å | ∠D–H···A/° |
| N(7)–H(31)···O(32) <sup>§</sup>  | 2.960(3) | 0.920 | 2.059   | 166        |
| N(7)–H(32)···O(22)               | 3.235(5) | 0.920 | 2.431   | 146        |
| N(8)–H(39)···O(15)               | 2.800(3) | 0.920 | 1.907   | 163        |
| N(8)–H(40)···O(16) <sup>□</sup>  | 2.963(3) | 0.920 | 2.045   | 175        |
| N(9)–H(41)···O(14) <sup>¶</sup>  | 3.071(3) | 0.920 | 2.298   | 141        |
| N(9)–H(41)···O(32) <sup>§</sup>  | 3.007(2) | 0.920 | 2.350   | 128        |
| N(9)–H(42)···O(16) <sup>□</sup>  | 2.946(3) | 0.920 | 2.035   | 170        |
| N(10)–H(49)···O(15)              | 2.829(3) | 0.920 | 2.136   | 131        |
| N(10)–H(50)···O(27)              | 2.919(3) | 0.920 | 2.004   | 172        |
| N(11)–H(51)···O(14) <sup>¶</sup> | 2.882(3) | 0.920 | 1.996   | 161        |
| N(11)–H(52)···O(27)              | 2.930(2) | 0.920 | 2.013   | 174        |
| N(12)–H(59)···O(17)              | 2.926(2) | 0.920 | 2.028   | 165        |
| N(12)–H(60)···O(13)              | 2.998(2) | 0.920 | 2.243   | 139        |

Symmetry operators; \*: 1–x –y 1–z; †: x–1 y z; ‡: x+1 y+1 z+1; §: 2–x 1–y –z; □: 1–x 1–y –z; ¶: x+1 y z.

Supplementary Material (ESI) for New Journal of Chemistry  
This journal is © The Royal Society of Chemistry and  
The Centre National de la Recherche Scientifique, 2010

**Table S3** Relevant coordination bond lengths (Å) and angles (°) with their estimated standard deviations in parentheses for  $\Lambda$ -[Co(tn)<sub>3</sub>]P<sub>3</sub>O<sub>9</sub>·2.5H<sub>2</sub>O

| Bond length / Å |                    |                   |            |
|-----------------|--------------------|-------------------|------------|
| Co(1)–N(1)      | 1.977(2)           | Co(1)–N(4)        | 1.998(2)   |
| Co(1)–N(2)      | 1.9850(19)         | Co(1)–N(5)        | 1.9882(18) |
| Co(1)–N(3)      | 2.0090(18)         | Co(1)–N(6)        | 1.9760(18) |
| Co(2)–N(7)      | 1.984(2)           | Co(2)–N(10)       | 1.9784(19) |
| Co(2)–N(8)      | 1.979(2)           | Co(2)–N(11)       | 1.993(2)   |
| Co(2)–N(9)      | 1.9842(19)         | Co(2)–N(12)       | 1.9891(19) |
|                 | Co–N <sub>av</sub> |                   | 1.987 Å    |
| Bond angle / °  |                    |                   |            |
| N(1)–Co(1)–N(2) | 93.56(8)           | N(7)–Co(2)–N(8)   | 94.06(9)   |
| N(3)–Co(1)–N(4) | 88.76(8)           | N(9)–Co(2)–N(10)  | 93.93(8)   |
| N(5)–Co(1)–N(6) | 94.43(7)           | N(11)–Co(2)–N(12) | 89.83(8)   |

**Table S4** Hydrogen bond distances and angles for  $\Lambda$ -[Co(tn)<sub>3</sub>]P<sub>3</sub>O<sub>9</sub>·2.5H<sub>2</sub>O

| <b>Co1 (N1–N6)</b>               |          |       |         |            |
|----------------------------------|----------|-------|---------|------------|
| D–H···A                          | D···A/Å  | D–H/Å | H···A/Å | ∠D–H···A/° |
| N(1)–H(1)···O(9)                 | 2.776(2) | 0.950 | 1.851   | 164        |
| N(1)–H(2)···O(20)                | 2.924(2) | 0.950 | 2.121   | 141        |
| N(2)–H(9)···O(4)*                | 2.821(2) | 0.950 | 1.878   | 172        |
| N(2)–H(10)···O(15)               | 2.920(2) | 0.950 | 1.970   | 178        |
| N(3)–H(11)···O(9)                | 2.981(2) | 0.950 | 2.176   | 142        |
| N(3)–H(12)···O(15)               | 2.910(2) | 0.950 | 1.968   | 171        |
| N(4)–H(19)···O(4)*               | 2.870(2) | 0.950 | 2.118   | 135        |
| N(4)–H(20)···O(17) <sup>†</sup>  | 2.886(2) | 0.950 | 1.938   | 175        |
| N(5)–H(21)···O(7)                | 2.942(2) | 0.950 | 2.043   | 157        |
| N(5)–H(22)···O(17) <sup>†</sup>  | 2.847(2) | 0.950 | 1.915   | 166        |
| N(6)–H(29)···O(6)*               | 2.986(2) | 0.950 | 2.145   | 147        |
| N(6)–H(30)···O(23)               | 3.003(3) | 0.950 | 2.171   | 146        |
| <b>Co2 (N7–N12)</b>              |          |       |         |            |
| D–H···A                          | D···A/Å  | D–H/Å | H···A/Å | ∠D–H···A/° |
| N(7)–H(31)···O(16) <sup>‡</sup>  | 2.793(2) | 0.950 | 2.021   | 137        |
| N(7)–H(32)···O(5)                | 3.193(2) | 0.950 | 2.407   | 140        |
| N(8)–H(39)···O(13)               | 2.937(2) | 0.950 | 2.035   | 158        |
| N(8)–H(40)···O(21) <sup>§</sup>  | 2.962(2) | 0.950 | 2.129   | 146        |
| N(9)–H(41)···O(14) <sup>‡</sup>  | 3.087(2) | 0.950 | 2.321   | 137        |
| N(9)–H(42)···O(18) <sup>‡</sup>  | 2.819(3) | 0.950 | 1.947   | 152        |
| N(10)–H(49)···O(13)              | 2.858(2) | 0.950 | 1.939   | 162        |
| N(10)–H(50)···O(8)               | 2.806(2) | 0.950 | 1.873   | 167        |
| N(11)–H(51)···O(16) <sup>‡</sup> | 2.948(2) | 0.950 | 2.131   | 143        |
| N(11)–H(52)···O(8) <sup>□</sup>  | 3.002(2) | 0.950 | 2.080   | 163        |
| N(12)–H(59)···O(10)              | 3.261(2) | 0.950 | 2.447   | 144        |
| N(12)–H(59)···O(13)              | 3.031(2) | 0.950 | 2.253   | 139        |
| N(12)–H(60)···O(5)               | 2.898(2) | 0.950 | 1.973   | 164        |

**Table S4** Hydrogen bond distances and angles for  $\Lambda$ -[Co(tn)<sub>3</sub>]P<sub>3</sub>O<sub>9</sub>·2.5H<sub>2</sub>O (continued)

| <b>O<sub>H2O</sub></b>            |          |       |         |            |
|-----------------------------------|----------|-------|---------|------------|
| D–H···A                           | D···A/Å  | D–H/Å | H···A/Å | ∠D–H···A/° |
| O(19)–H(61)···O(5)                | 2.904(2) | 0.857 | 2.057   | 170        |
| O(19)–H(62)···O(15)               | 2.904(2) | 0.931 | 2.035   | 155        |
| O(20)–H(63)···O(6) <sup>¶</sup>   | 2.788(2) | 0.831 | 1.960   | 175        |
| O(20)–H(64)···O(21)               | 2.898(2) | 0.942 | 1.967   | 169        |
| O(21)–H(65)···O(14)**             | 2.761(2) | 0.829 | 1.936   | 173        |
| O(21)–H(66)···O(22)               | 2.808(2) | 0.869 | 1.949   | 170        |
| O(22)–H(67)···O(7) <sup>¶</sup>   | 2.761(2) | 0.920 | 1.852   | 169        |
| O(22)–H(68)···O(18) <sup>††</sup> | 2.740(2) | 0.876 | 1.868   | 172        |
| O(23)–H(69)···O(22)               | 2.835(2) | 0.766 | 2.080   | 169        |
| O(23)–H(70)···O(8)*               | 2.805(2) | 0.885 | 1.945   | 164        |

Symmetry operators; \*: x–1 y z; †: 1–x 1/2+y 1/2–z; ‡: x+1 y z; §: 3/2–x –y 1/2–z; ¶: 2–x 1/2+y 1/2–z; ¶¶: x–1/2 1/2–y 1–z; \*\*: 1–x –1/2+y 1/2–z; ††: 1/2–x –y 1/2+z.



**Table S5** Relevant coordination bond lengths (Å) and angles (°) with their estimated standard deviations in parentheses for  $\Lambda$ -[Cr(tn)<sub>3</sub>]P<sub>3</sub>O<sub>9</sub>·2.5H<sub>2</sub>O

| Bond length / Å |                    |                   |            |
|-----------------|--------------------|-------------------|------------|
| Cr(1)–N(1)      | 2.0752(16)         | Cr(1)–N(4)        | 2.0990(17) |
| Cr(1)–N(2)      | 2.0793(17)         | Cr(1)–N(5)        | 2.0832(16) |
| Cr(1)–N(3)      | 2.1066(18)         | Cr(1)–N(6)        | 2.0839(17) |
| Cr(2)–N(7)      | 2.089(2)           | Cr(2)–N(10)       | 2.0712(16) |
| Cr(2)–N(8)      | 2.0846(17)         | Cr(2)–N(11)       | 2.0965(18) |
| Cr(2)–N(9)      | 2.0994(19)         | Cr(2)–N(12)       | 2.0905(18) |
|                 | Cr–N <sub>av</sub> | 2.088 Å           |            |
| Bond angle / °  |                    |                   |            |
| N(1)–Cr(1)–N(2) | 92.06(6)           | N(7)–Cr(2)–N(8)   | 89.84(7)   |
| N(3)–Cr(1)–N(4) | 86.86(7)           | N(9)–Cr(2)–N(10)  | 90.92(7)   |
| N(5)–Cr(1)–N(6) | 92.78(6)           | N(11)–Cr(2)–N(12) | 86.97(7)   |

**Table S6** Hydrogen bond distances and angles for  $\Lambda$ -[Cr(tn)<sub>3</sub>]P<sub>3</sub>O<sub>9</sub>·2.5H<sub>2</sub>O

| <b>Cr1 (N1–N6)</b>               |            |       |         |            |
|----------------------------------|------------|-------|---------|------------|
| D–H···A                          | D···A/Å    | D–H/Å | H···A/Å | ∠D–H···A/° |
| N(1)–H(1)···O(9)                 | 2.775(2)   | 0.950 | 1.843   | 166        |
| N(1)–H(2)···O(20)                | 2.925(2)   | 0.950 | 2.101   | 144        |
| N(2)–H(9)···O(4)*                | 2.838(2)   | 0.950 | 1.901   | 168        |
| N(2)–H(10)···O(15)               | 2.936(2)   | 0.950 | 1.986   | 177        |
| N(3)–H(11)···O(9)                | 3.014(2)   | 0.950 | 2.202   | 143        |
| N(3)–H(12)···O(15)               | 2.9115(19) | 0.950 | 1.969   | 172        |
| N(4)–H(19)···O(4)*               | 2.878(2)   | 0.950 | 2.124   | 135        |
| N(4)–H(20)···O(17) <sup>†</sup>  | 2.891(2)   | 0.950 | 1.946   | 173        |
| N(5)–H(21)···O(7)                | 2.923(2)   | 0.950 | 2.019   | 158        |
| N(5)–H(22)···O(17) <sup>†</sup>  | 2.866(2)   | 0.950 | 1.933   | 167        |
| N(6)–H(29)···O(6)*               | 2.933(2)   | 0.950 | 2.079   | 149        |
| N(6)–H(30)···O(23)               | 2.972(2)   | 0.950 | 2.125   | 148        |
| <b>Cr2 (N7–N12)</b>              |            |       |         |            |
| D–H···A                          | D···A/Å    | D–H/Å | H···A/Å | ∠D–H···A/° |
| N(7)–H(31)···O(18) <sup>‡</sup>  | 3.122(2)   | 0.950 | 2.186   | 168        |
| N(7)–H(32)···O(16) <sup>‡</sup>  | 2.778(2)   | 0.950 | 2.228   | 116        |
| N(8)–H(39)···O(13)               | 2.926(2)   | 0.950 | 2.058   | 151        |
| N(8)–H(40)···O(21) <sup>§</sup>  | 2.937(2)   | 0.950 | 2.069   | 151        |
| N(9)–H(41)···O(14) <sup>‡</sup>  | 3.007(2)   | 0.950 | 2.198   | 142        |
| N(9)–H(42)···O(18) <sup>‡</sup>  | 2.843(2)   | 0.950 | 1.943   | 157        |
| N(10)–H(49)···O(13)              | 2.848(2)   | 0.950 | 1.936   | 160        |
| N(10)–H(50)···O(8) <sup>□</sup>  | 2.8057(19) | 0.950 | 1.866   | 170        |
| N(11)–H(51)···O(16) <sup>‡</sup> | 2.912(2)   | 0.950 | 2.135   | 138        |
| N(11)–H(52)···O(8) <sup>□</sup>  | 3.086(2)   | 0.950 | 2.176   | 160        |
| N(12)–H(59)···O(10)              | 3.319(2)   | 0.950 | 2.477   | 148        |
| N(12)–H(59)···O(13)              | 3.117(2)   | 0.950 | 2.381   | 134        |
| N(12)–H(60)···O(5)               | 2.8822(18) | 0.950 | 1.969   | 161        |

**Table S6** Hydrogen bond distances and angles for  $\Lambda$ -[Cr(tn)<sub>3</sub>]P<sub>3</sub>O<sub>9</sub>·2.5H<sub>2</sub>O (continued)

| <b>O<sub>H2O</sub></b>            |            |       |         |            |
|-----------------------------------|------------|-------|---------|------------|
| D–H···A                           | D···A/Å    | D–H/Å | H···A/Å | ∠D–H···A/° |
| O(19)–H(61)···O(5)                | 2.925(2)   | 0.910 | 2.111   | 149        |
| O(19)–H(62)···O(15)               | 2.884(2)   | 1.004 | 1.890   | 170        |
| O(20)–H(63)···O(6) <sup>¶</sup>   | 2.796(2)   | 0.921 | 1.883   | 171        |
| O(20)–H(64)···O(21)               | 2.8928(19) | 0.857 | 2.051   | 167        |
| O(21)–H(65)···O(14)**             | 2.7628(19) | 0.980 | 1.788   | 173        |
| O(21)–H(66)···O(22)               | 2.785(2)   | 0.918 | 1.895   | 163        |
| O(22)–H(67)···O(7) <sup>¶</sup>   | 2.745(2)   | 0.873 | 1.877   | 173        |
| O(22)–H(68)···O(18) <sup>††</sup> | 2.771(2)   | 0.919 | 1.856   | 173        |
| O(23)–H(69)···O(22)               | 2.865(2)   | 0.892 | 1.977   | 174        |
| O(23)–H(70)···O(8)*               | 2.794(2)   | 0.982 | 1.833   | 165        |

Symmetry operators; \*: x–1 y z; †: 1–x 1/2+y 1/2–z; ‡: x+1 y z; §: 3/2–x –y 1/2–z; □: 2–x 1/2+y 1/2–z; ¶: x–1/2 1/2–y 1–z; \*\*: 1–x –1/2+y 1/2–z; ††: 1/2–x –y 1/2+z.

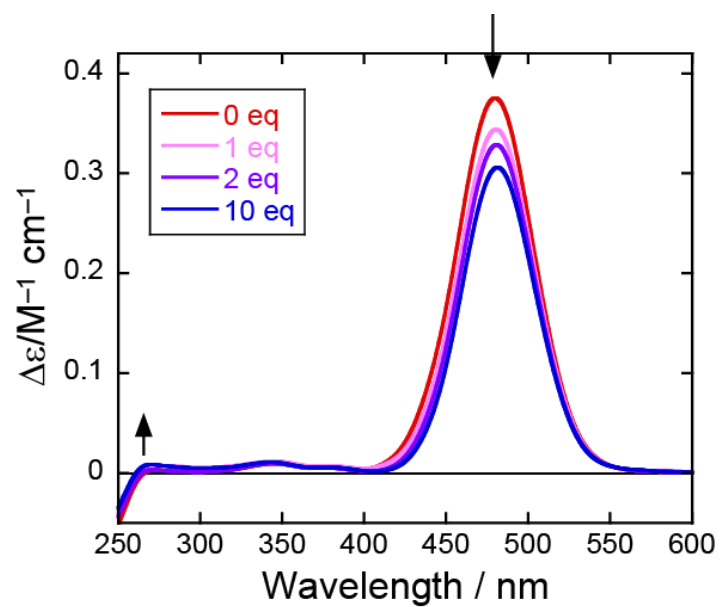

**Fig. S1** CD spectral changes of  $\Lambda$ -[Cr(tn)<sub>3</sub>]Br<sub>3</sub> (2.5 mM) as a function of Na<sub>3</sub>P<sub>3</sub>O<sub>9</sub> concentration (0–25 mM).

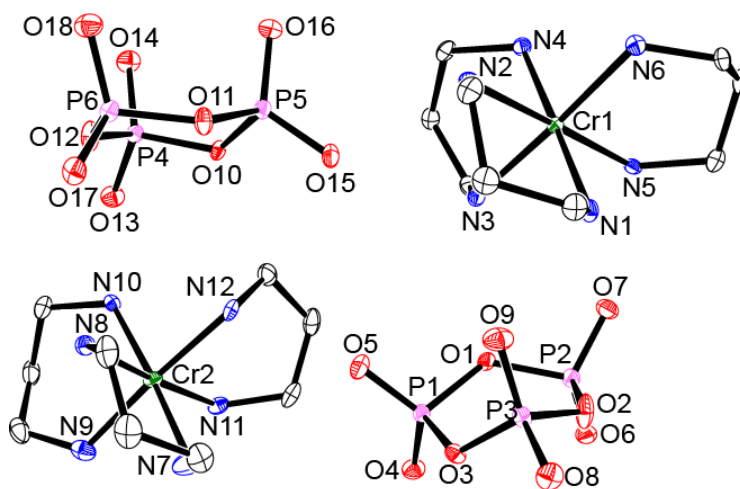

**Fig. S2** ORTEP view of  $\Lambda$ -[Cr(tn)<sub>3</sub>]P<sub>3</sub>O<sub>9</sub>·2.5H<sub>2</sub>O with selected atom numbering schemes. Water molecules and hydrogen atoms are omitted for clarity.

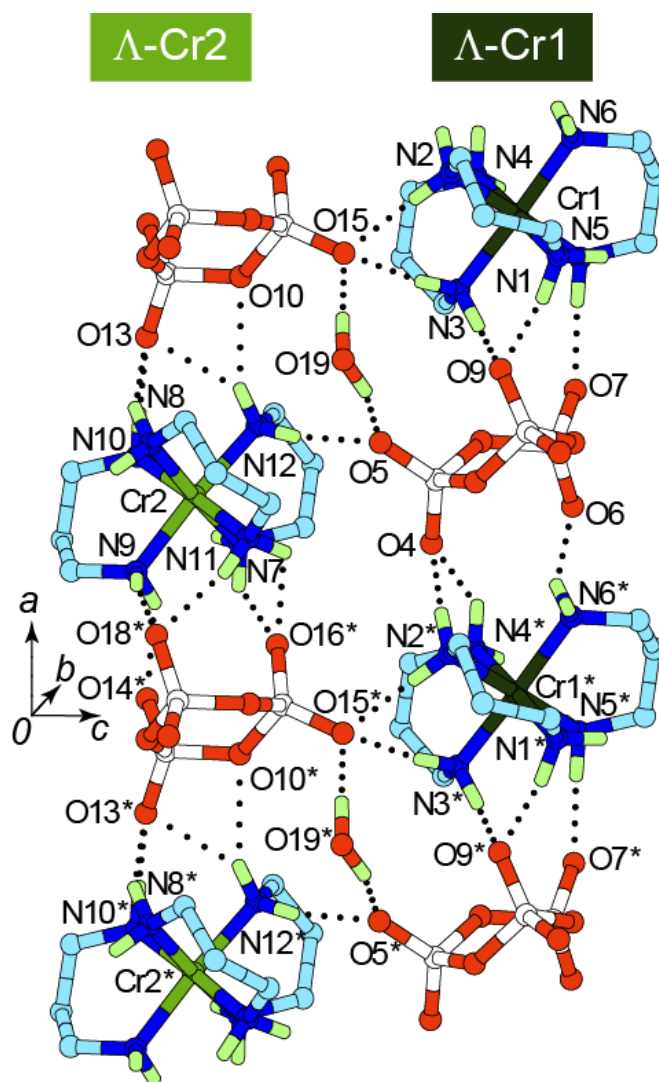

**Fig. S3** Homochiral column-pair structure of  $\Lambda$ -[Cr(tn)<sub>3</sub>]P<sub>3</sub>O<sub>9</sub>·2.5H<sub>2</sub>O, which was constructed by multiple hydrogen bonds between the alternately stacked [Cr(tn)<sub>3</sub>]<sup>3+</sup> cations and P<sub>3</sub>O<sub>9</sub><sup>3-</sup> anions, and the neighboring columns are further linked by hydrogen bonds.

Symmetry operator \*:  $x-1, y, z$ .
